# Supplementary material
Source: PubMed Central journal article supplement (PMC5756488)
Supplement: jgv-97-2291-s001.pdf [file jgv-97-2291-s001.pdf]

**Supplementary Table 1:** Histological analysis of biopsies from stem cell transplant recipients that were HuNoV positive (Table 1A) or HuNoV negative (Table 1B). Alternating white and grey columns are used to separate biopsies by patients. Immunosuppression in patients and controls ; TCD- T cell depleted allograft, Tac - tacrolimus, Sir - sirolimus, Steroids, CsA-Cyclosporine, MMF- Mycophenylate mofetil. The duodenal biopsies are identified by prefix Du, ileal biopsy by prefix IL, Colon biopsies are identified by prefix Co. RtCo – Right colon, Lt Co- left colon, SigCo- Sigmoid colon. Ctrl indicates biopsies from HuNoV-negative patients. Multiple biopsies from the same patient are labeled alphabetically.(-) indicates absence of a particular histological feature; (+, ++) indicates prevalence of the histological feature was observed. N- Nausea, V- vomiting, D- Diarrhea. A – Anorexia, NA – Not applicable, ND – Not detected CMV - Cytomegalovirus Virus and C diff – Clostridium difficile. Standard GVH grade is used to indicate the severity. § - Patient is 4 years out of transplant had chronic GVH of skin and liver. # - Patient >1 year post transplant. The minus sign for biopsy collection indicates that biopsy was obtained prior to the stool that was tested to confirm the HuNoV infection. All the patients had GI symptoms as indicated in the table when they were biopsied.

**Supplementary Table 1A. HuNoV-positive stem cell transplant recipients**

| Intestinal segment                                           |                                    | Duodenum          |         |                           |         |         |          |                    |         |                                     |                   |                  |          |          |         | Ileum           | Colon           |                 |                             |         |          |
|--------------------------------------------------------------|------------------------------------|-------------------|---------|---------------------------|---------|---------|----------|--------------------|---------|-------------------------------------|-------------------|------------------|----------|----------|---------|-----------------|-----------------|-----------------|-----------------------------|---------|----------|
| Patient                                                      | N1                                 | N3                |         |                           | N4      |         | N5       | N6                 |         | N7                                  |                   | N8               | N9       |          | N10     | N11             | N11             | N1              |                             |         | N12      |
| Immunosuppression                                            | TCD                                | Tac,Sir, Steroids | TCD     |                           | TCD     | TCD     | CsA, MMF | CsA, MMF           |         | Tac, Sir                            | TCD               | TCD              | CsA, MMF | TCD      | TCD     | TCD             | TCD             | TCD             |                             |         | Tac, Sir |
| Biopsy                                                       | Du1                                | Du3A              | Du3B1   | Du4A                      | Du4B    | Du5     | Du6      | Du7A               | Du7B    | Du8                                 | Du9A              | Du9B             | Du10     | Du11     | IL11    | RtCo1           | LtCo1           | SigCo1          | RtCo12                      |         |          |
| Biopsy Collection from the first HuNoV-positive stool (Days) | 119                                | -45               | 7       | 47                        | 148     | 0       | -140     | -74                | -10     | 19                                  | -155              | -33              | unknown  | -7       | 83      | 130             | 130             | 130             | -21                         |         |          |
| Histological Observation                                     | Detection of VP1 by IF             | ND                | +       | ++                        | ND      | ND      | ND       | +                  | ND      | ND                                  | ND                | ND               | +        | ND       | ND      | ++              | ND              | ND              | ND                          | ND      |          |
|                                                              | Gastric metaplasia                 | ND                | ND      | +                         | ND      | ND      | ND       | ND                 | ND      | ND                                  | ND                | +                | ND       | ND       | ND      | +               | ND              | ND              | ND                          | ND      |          |
|                                                              | Basolateral vacuoles in epithelium | ++                | ++      | ++                        | ++      | ++      | ++       | ++                 | ++      | ++                                  | ++                | ++               | ND       | ++       | ++      | ND              | ND              | ND              | ND                          | ND      |          |
|                                                              | Crypt elongation                   | ND                | ND      | ND                        | ND      | ND      | +        | +                  | ND      | ND                                  | ND                | ND               | ND       | ND       | ND      | ND              | ND              | ND              | ND                          | ND      |          |
|                                                              | Edema                              | +                 | +       | +                         | +       | ND      | +        | +                  | ND      | ND                                  | +                 | ND               | +        | +        | +       | +               | ND              | ND              | ND                          | ND      |          |
|                                                              | Hemorrhage                         | +                 | +       | +                         | +       | +       | +        | +                  | +       | +                                   | ND                | +                | +        | +        | +       | +               | ND              | ND              | ND                          | ND      |          |
|                                                              | Flattened and expanded capillaries | ND                | +       | ND                        | +       | ND      | ND       | ND                 | ND      | ND                                  | ND                | ND               | ND       | ND       | ND      | -               | ND              | ND              | ND                          | ND      |          |
|                                                              | Cell debris                        | ND                | +       | +                         | ND      | ND      | ND       | ND                 | ND      | ND                                  | ND                | +                | +        | ND       | ND      | +               | ND              | ND              | ND                          | ND      |          |
|                                                              | Heterochromatic nuclei in crypt    | ND                | ND      | +                         | ND      | ND      | ND       | ND                 | ND      | ND                                  | ND                | ND               | ND       | ND       | +       | ND              | ND              | ND              | ND                          | ND      |          |
| GI presentation                                              | V, D, & wasting                    | D, cramps         | PI      | D, partial SB obstruction | D       | D, A    | D, N     | N, V & poor intake | D & A   | N, D, weakness & abdominal cramping | V, D, dehydration | Blood per rectum | D        | N, V & D | D       | V, D, & wasting | V, D, & wasting | V, D, & wasting | D, cramps, gas and bloating |         |          |
| Other complications                                          | GVH                                | Grade 0           | Grade 0 | Grade 0                   | Grade 1 | Grade 0 | Grade 0  | Grade 1            | Grade 1 | Grade 0                             | §                 | #                | #        | Grade 0  | Grade 1 | Grade 1         | Grade 0         | Grade 0         | Grade 0                     | Grade 0 |          |
|                                                              | Co-Infections                      | NA                | NA      | NA                        | C diff  | NA      | NA       | NA                 | NA      | NA                                  | NA                | NA               | NA       | C diff   | NA      | NA              | NA              | NA              | NA                          | NA      |          |

**Supplementary Table 1B. HuNoV-negative stem cell transplant recipients**

| Intestinal segment              |                         | Duodenum |          |          |          |          |          |          |          |           |           |  |
|---------------------------------|-------------------------|----------|----------|----------|----------|----------|----------|----------|----------|-----------|-----------|--|
| Patient                         | 1                       | 2        | 3        | 4        | 5        | 6        | 7        | 8        | 9        | 10        | 11        |  |
| Immunosuppression               | TCD                     | TCD      | TCD      | Tac      | CsA      | Tac, Sir | Tac, MMF | Tac      | Tac, Sir | TCD       | TCD       |  |
| Biopsy                          | Ctrl Du1                | Ctrl Du2 | Ctrl Du3 | Ctrl Du4 | Ctrl Du5 | Ctrl Du6 | Ctrl Du7 | Ctrl Du8 | Ctrl Du9 | Ctrl Du10 | Ctrl Du11 |  |
| Histological Observation        | Detection of VP1 by IF  | ND        | ND        |  |
|                                 | Gastric metaplasia      | ND        | ND        |  |
|                                 | Basolateral vacuoles in | +        | +        | +        | +        | +        | +        | +        | +        | +         | +         |  |
|                                 | Crypt elongation        | ND        | ND        |  |
|                                 | Edema                   | ND        | ND        |  |
|                                 | Hemorrhage              | +        | ND       | +        | +        | ND       | ND       | +        | +        | ND        | +         |  |
|                                 | Flattened and expanded  | ND        | ND        |  |
|                                 | Cell debris             | ND        | ND        |  |
| Heterochromatic nuclei in crypt | ND                      | ND       | ND       | ND       | ND       | ND       | ND       | ND       | ND       | ND        |           |  |
| GI presentation                 | D & N                   | None     | N        | None     | None     | N        | D & N    | N        | D        | D         | N         |  |
| Other complications             | Upper GI GVH            | Grade 1  | Grade 0  | Grade 1  | Grade 0  | Grade 1  | Grade 1  | Grade 1  | Grade 1  | Grade 0   | Grade 0   |  |
|                                 | Co-Infections           | ND       | CMV       | CMV       |  |

**Supplementary Table 2. Cell types positive for HuNoV VP1 by immunofluorescence**

| Biopsy          | Number of VP1 positive cells per section* |                |        |                  |
|-----------------|-------------------------------------------|----------------|--------|------------------|
|                 | Epithelial cells                          | Lamina Propria |        |                  |
|                 |                                           | Macrophages    | T cell | Dendritic cell** |
| Duodenum (4/14) | 5-20                                      | >20            | >20    | 4                |
| Jejunum (16/19) | 0-10                                      | 7-10           | ND     | 2                |
| Ileum (1/1)     | 3                                         | >20            | >20    | 0                |

ND-not done. \*\* Not all dendritic cells were positive for the presence of VP1. The numbers in parentheses indicate the number of biopsies positive for VP1 out of the total number of biopsies analyzed. 2-3 biopsy sections were tested for VP1 expression in duodenal and jejunum biopsies. 5 sections were analyzed for the ileal biopsy. For the immune cells, a single section was analyzed per biopsy.

**Supplementary Fig. 1. Validation of antibodies to detect HuNoV antigens.** The ability of a polyclonal anti-VP1 (green, a) and the monoclonal antibody NS14 (magenta, b) to detect HuNoV VP1 was analyzed using HEK cells expressing GII.4 VP1 (a-c) or mock-transfected cells (d-f). HuNoV VP1 was detected by both the anti-VP1 and NS14 antibodies in an overlapping pattern in GII.4 VP1-expressing HEK cells (white, c) but not in the mock-transfected cells (d-f). Monoclonal antibody 9E3, an isotype control for NS14 (k and m) and pre-immune VP1 serum (l and n) did not detect VP1 in the GII.4 VP1-expressing HEK cells (k and l) or the mock-transfected cells (m and n). HEK cells expressing full-length HuNoV genome were used to detect RdRp and VPg. Anti-RdRp detected RdRp in cells expressing the HuNoV genome (g) but not the control (h). Similarly, anti-VPg detected VPg in cells expressing the HuNoV genome (i) but not the control (j). The pre-immune sera for anti-VPg or anti-RdRp did not detect VPg or RdRp in cells expressing the HuNoV genome (o and p) or the control (q and r). Scale bars 10 $\mu$ m.

Supplementary Figure 1.

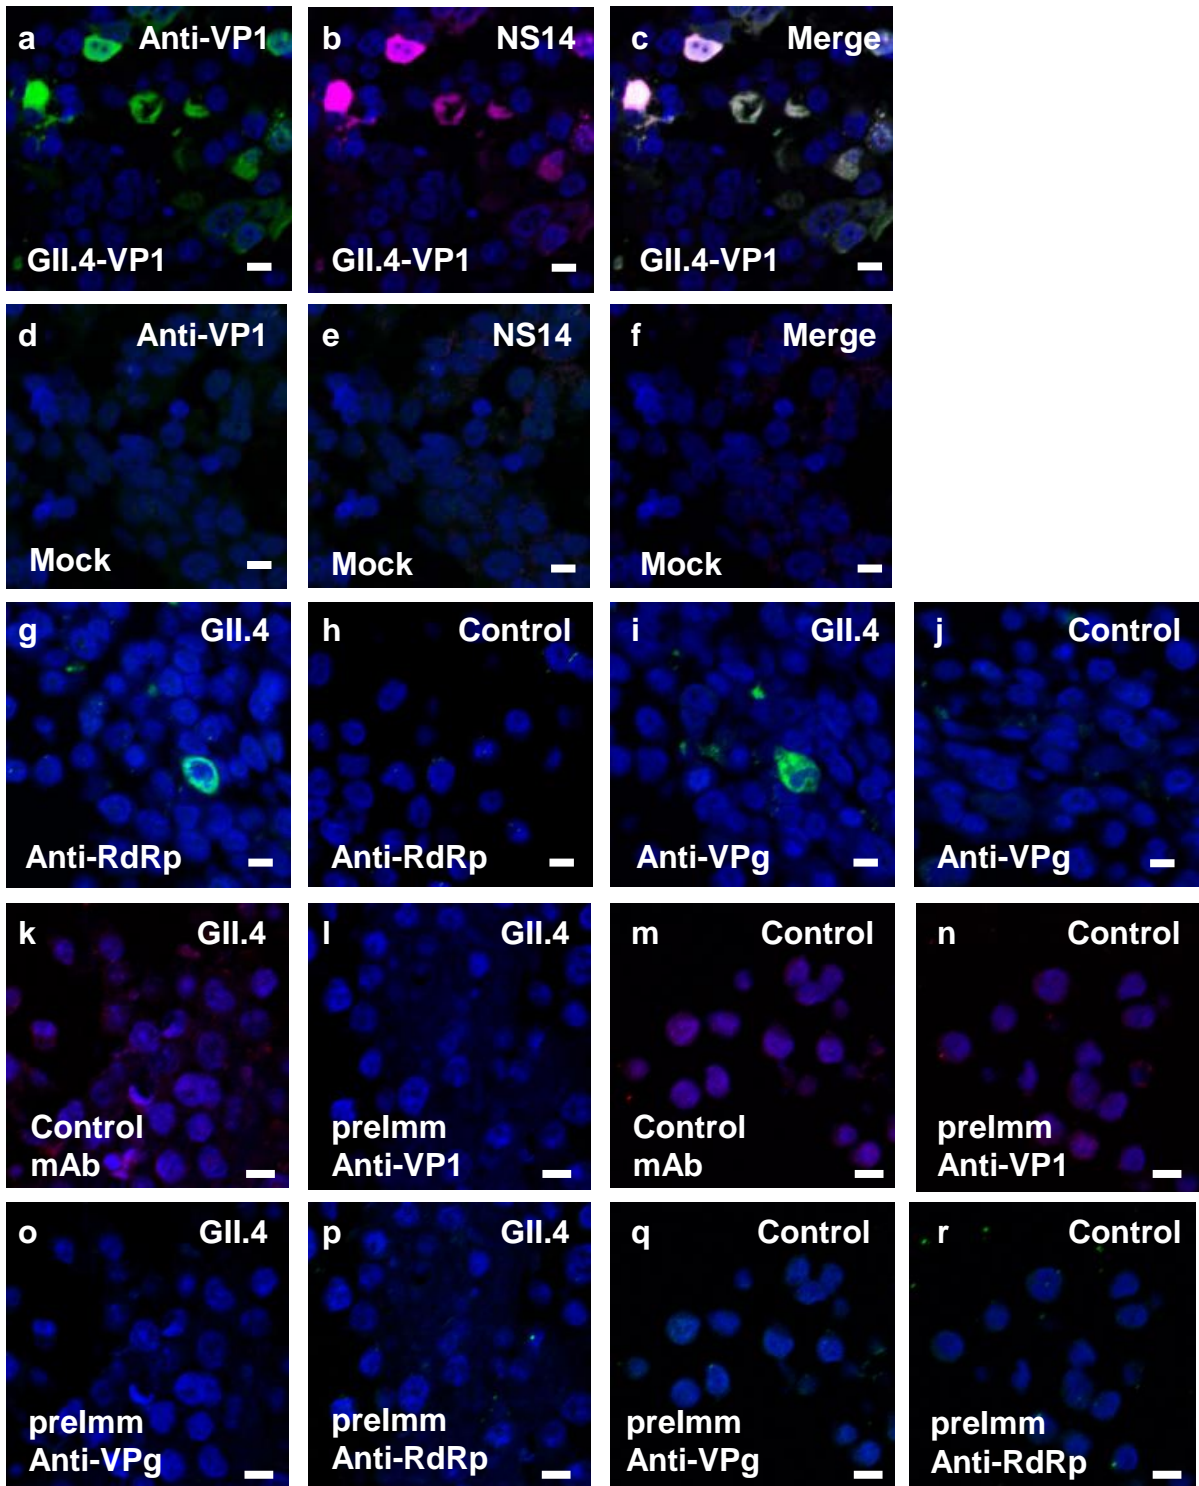

## Supplementary Figure 2.

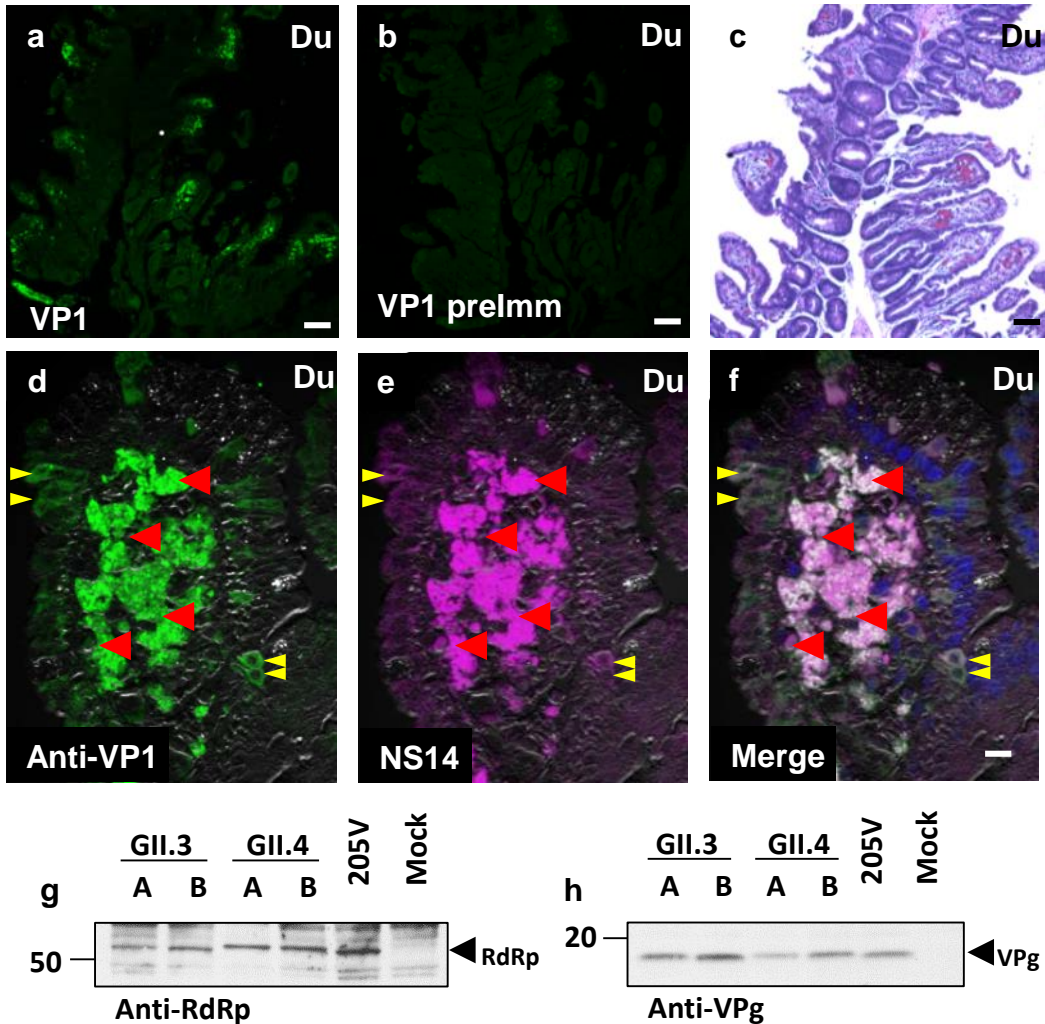

**Supplementary Fig. 2a-f. Anti-VP1 specifically detects HuNoV VP1 in duodenal biopsy.** Serial sections of a duodenal biopsy from a HuNoV-positive patient was stained, with guinea pig anti-VP1 (a) and pre-immune VP1 (b). The histology of the same biopsy was analyzed by H&E staining (c). A small portion of the same biopsy is shown at a higher magnification (d-f) stained with polyclonal serum guinea pig anti-VP1 (green, d) and mAb NS14 (magenta, e). The two antibodies show overlapping staining (white, f). VP1 was detected in enterocytes (yellow arrowheads, d-f) as well as in the cells of the lamina propria (red arrowheads, d-f). Nuclei are stained blue by DAPI (f). Scale bars a-c 100 $\mu$ m; d-f 10 $\mu$ m.

**Supplementary Fig. 2g and h. Validation of antibodies raised against GII.3 RdRp and VPg to detect GII.4 RdRp and VPg by western.** Full-length constructs that expressed the HuNoV genome were transfected into HEK293FT cells. The cells were harvested after 24hrs and non-structural proteins RdRp (g) and VPg (h) were detected by western blot. HEK293FT cells were transfected with the constructs expressing full length HuNoV genomes of - **GII.3** (U201 clones A and B served as positive control), **HuNoV GII.4** construct (SAGA clones A and B served as the test), **205V** (HuNoV GII.3-GFP) was an additional positive control and **mock** (empty vector shows background and served as a negative control). Primary antibodies for panel g: rabbit anti-GII.3 RdRp, and for panel h: rabbit anti-GII.3 VPg. goat anti-Rb HRP was used to detect the primary antibodies.

### Supplementary Figure 3.

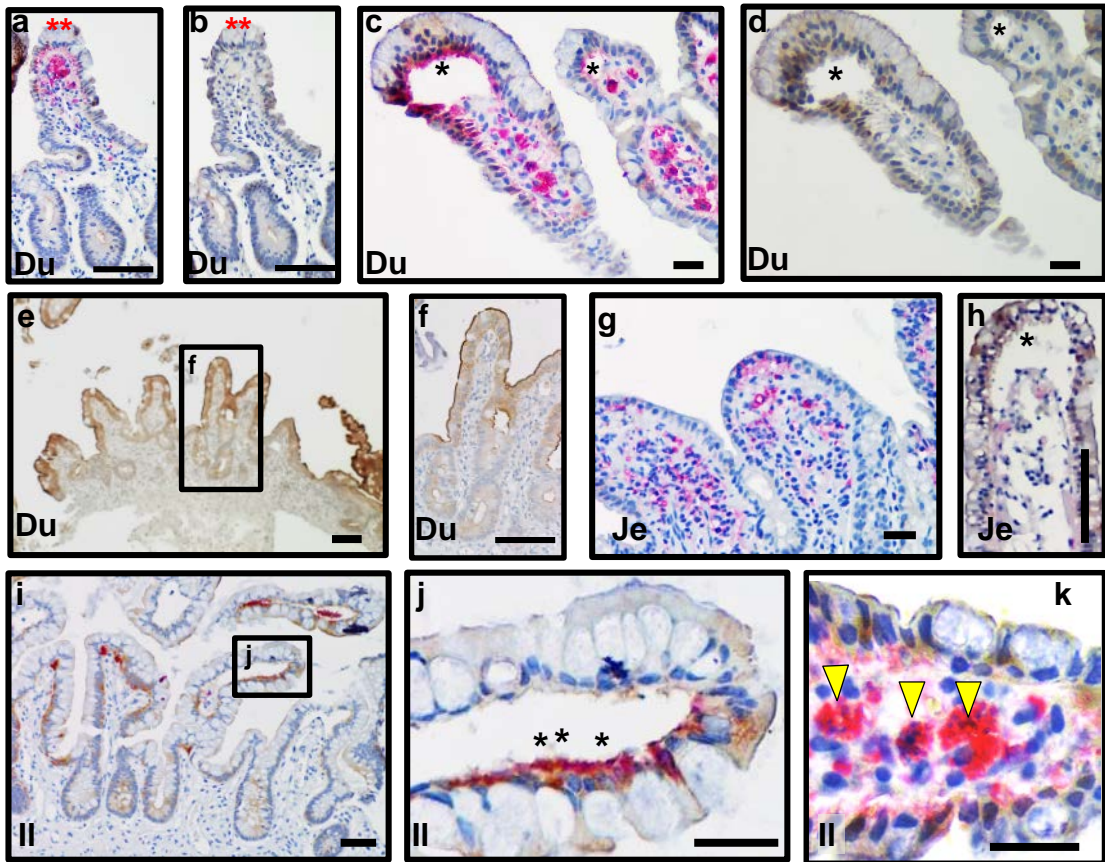

**Supplementary Fig. 3. Detection of HuNoV VP1 in duodenum, jejunum and ileum by immunohistochemistry.** VP1 (red) and villin (brown) in duodenal (a-f), jejunal (g and h) and ileal (i-k) biopsies from HuNoV-positive (a-d, g-k) and HuNoV-negative (e and f) patients. Area highlighted by black rectangles and labeled in e and i are magnified in f and j, respectively. Loss of villin expression from the apical surface of the villus epithelium was observed in the biopsies from HuNoV-positive patients (a-d and g-k). VP1 was analyzed in serial sections of a duodenal biopsy stained with anti-VP1 (red, a and c) but not stained with pre-immune anti-VP1 (b and d). Panel (a) shows a larger area of the biopsy shown in Figure 1h, j & k. In the HuNoV-negative patient, VP1 was not detected; however, apical villin was detected in the villous epithelial cells (e and f). The jejunal villi (g and h) show the presence of VP1, but it was absent in the crypts (g). In the ileum, VP1 antigen is present in the lamina propria cells (yellow arrowheads, k). Scale bars 50 $\mu$ m.

### Supplementary Figure 4.

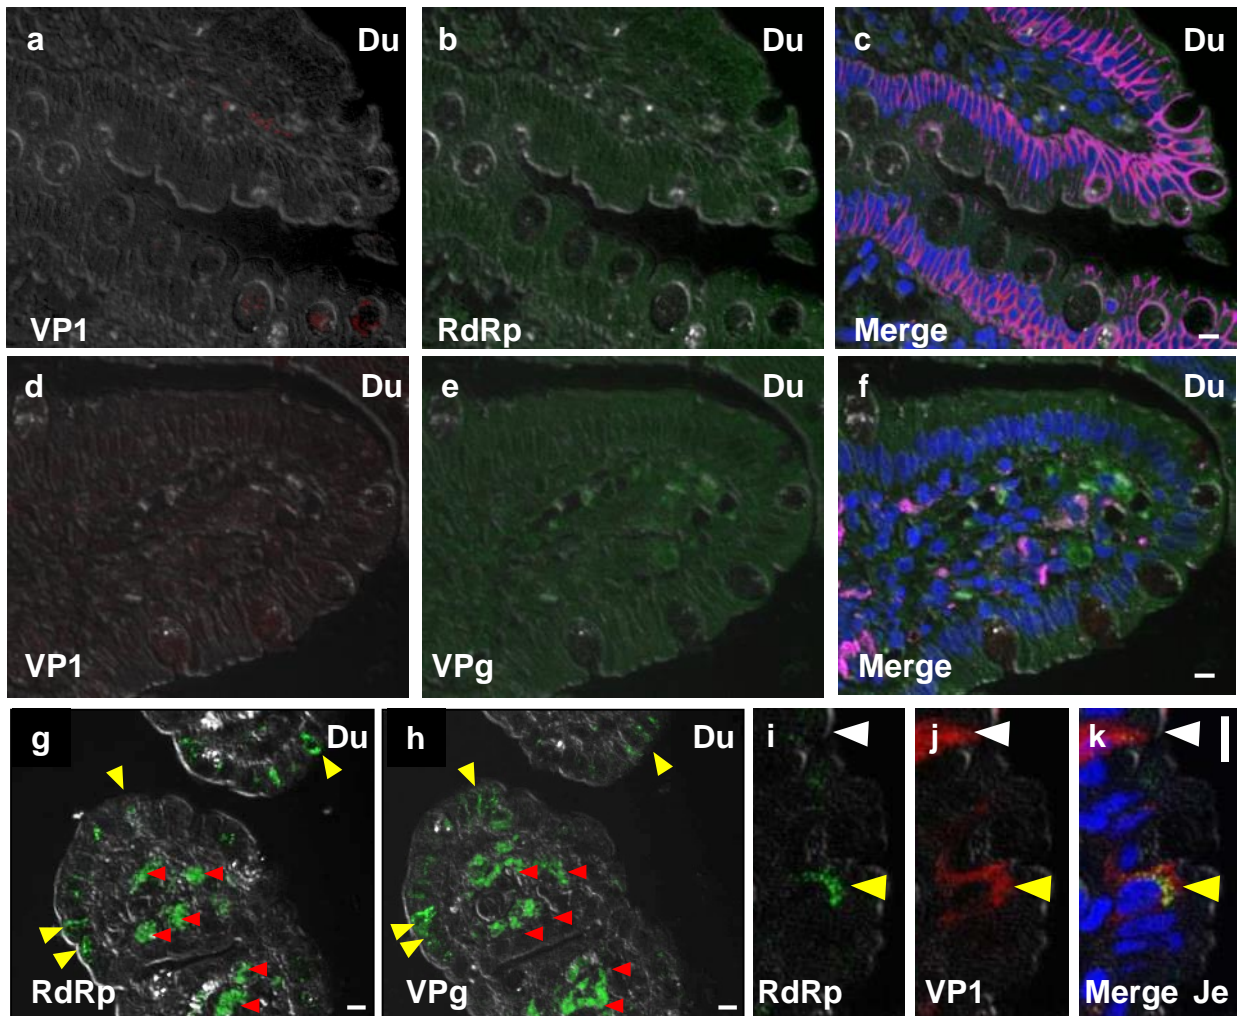

**Supplementary Fig. 4. Immunofluorescence-based detection of HuNoV non-structural proteins in biopsies.** HuNoV-negative biopsies (a-c and d-f) did not show staining for VP1 (red, a, c, d and f), RdRp (green, b), and VPg (green, e). Epithelial cells were identified by detection of E-cadherin expression (magenta, c) and macrophages by CD68 (magenta, f). Nuclei are stained with DAPI (blue, c and f).

Non-structural proteins RdRp (green, g) and VPg (green, h) were detected in serial sections of a HuNoV-positive duodenal biopsy. The matched areas between the two serial sections that are positive for both RdRp and VPg staining are indicated by arrowheads. The yellow arrowheads indicate the epithelial cells while the red arrowheads indicate the cells of the lamina propria positive for RdRp and VPg.

Detection of HuNoV proteins in a jejunal biopsy (i-k), RdRp (green, i and k) and VP1 (red, j and k) were detected in epithelial cells. Some cells show the presence of VP1 alone (white arrowhead, i-k), while some epithelial cells show the presence of both RdRp and VP1 (yellow arrowhead, i-k) in a perinuclear pattern. Scale Bars – 20  $\mu$ m.
